# Supplementary material for: Specific Nucleotides in the Common Region of the Begomovirus Tomato Rugose Mosaic Virus (ToRMV) Are Responsible for the Negative Interference over Tomato Severe Rugose Virus (ToSRV) in Mixed Infection
Source: MDPI journal article supplement (doi:10.3390/v15102074), 2023-10-11
Supplement: s1 [file s1]

**Supplementary Table S1.** Infectivity of tomato severe rugose virus (ToSRV) clones in single infection and in mixed infection with tomato rugose mosaic virus (ToRMV).

| Treatment <sup>*</sup>                   | Genomic component                                     | Infected plants <sup>§</sup> |           |             |           |
|------------------------------------------|-------------------------------------------------------|------------------------------|-----------|-------------|-----------|
|                                          |                                                       | Exp. I                       | Exp. II   | Exp. III    | Exp. IV   |
| ToSRV-A <sub>(wt)</sub>                  | ToS-A <sub>(wt)</sub> <sup>#</sup>                    | 3/10 (30)                    | 4/10 (40) | 4/10 (40)   | 5/10 (50) |
| ToRMV-A                                  | ToR-A <sup>#</sup>                                    | 4/10 (40)                    | 3/10 (30) | 3/10 (30)   | 4/10 (40) |
| ToSRV-A <sub>(ToR:CR)</sub>              | ToS-A <sub>(ToR:CR)</sub> <sup>#</sup>                | 6/10 (60)                    | 1/10 (10) | 7/9 (78)    | 5/10 (50) |
| ToSRV-A <sub>(ToR:IRD)</sub>             | ToS-A <sub>(ToR:IRD)</sub> <sup>#</sup>               | 6/10 (60)                    | 2/10 (20) | 10/10 (100) | 5/10 (50) |
| ToSRV-A <sub>(ToR:CR+IRD)</sub>          | ToS-A <sub>(ToR:CR+IRD)</sub> <sup>#</sup>            | 7/10 (70)                    | 3/10 (30) | 7/10 (70)   | 3/10 (30) |
| ToSRV-A <sub>(ToR:CR)</sub> /ToRMV-A     | ToS-A <sub>(ToR:CR)</sub> +ToR-A <sup>&amp;</sup>     | 2/10 (20)                    | 5/10 (50) | 7/10 (70)   | 1/10 (10) |
|                                          | ToS-A <sub>(ToR:CR)</sub> <sup>¶</sup>                | 0/10 (0)                     | 1/10 (10) | 2/10 (10)   | 2/10 (20) |
|                                          | ToR-A <sup>¶</sup>                                    | 0/10 (0)                     | 1/10 (10) | 1/10 (10)   | 1/10 (10) |
|                                          | ToS-B+ToR-B <sup>&amp;</sup>                          | 0/10 (0)                     | 0/10 (0)  | 3/10 (30)   | 2/10 (20) |
|                                          | ToS-B <sup>¶</sup>                                    | 0/10 (0)                     | 0/10 (0)  | 0/10 (0)    | 0/10 (0)  |
|                                          | ToR-B <sup>¶</sup>                                    | 2/10 (20)                    | 7/10 (70) | 3/10 (30)   | 2/10 (20) |
| ToSRV-A <sub>(ToR:IRD)</sub> /ToRMV-A    | ToS-A <sub>(ToR:IRD)</sub> +ToR-A <sup>&amp;</sup>    | 0/10 (0)                     | 0/10 (0)  | 1/10 (10)   | 0/10 (0)  |
|                                          | ToS-A <sub>(ToR:IRD)</sub> <sup>¶</sup>               | 2/10 (20)                    | 1/10 (10) | 1/10 (10)   | 2/10 (20) |
|                                          | ToR-A <sup>¶</sup>                                    | 3/10 (30)                    | 3/10 (30) | 1/10 (10)   | 3/10 (30) |
|                                          | ToS-B+ToR-B <sup>&amp;</sup>                          | 1/10 (10)                    | 0/10 (0)  | 0/10 (0)    | 0/10 (0)  |
|                                          | ToS-B <sup>¶</sup>                                    | 0/10 (0)                     | 1/10 (10) | 0/10 (0)    | 0/10 (0)  |
|                                          | ToR-B <sup>¶</sup>                                    | 4/10 (40)                    | 3/10 (30) | 1/10 (10)   | 4/10 (40) |
| ToSRV-A <sub>(ToR:CR+IRD)</sub> /ToRMV-A | ToS-A <sub>(ToR:CR+IRD)</sub> +ToR-A <sup>&amp;</sup> | 2/10 (20)                    | 1/10 (10) | 3/9 (33)    | 0/9 (0)   |
|                                          | ToS-A <sub>(ToR:CR+IRD)</sub> <sup>¶</sup>            | 1/10 (10)                    | 2/10 (20) | 0/9 (0)     | 1/9 (11)  |
|                                          | ToR-A <sup>¶</sup>                                    | 1/10 (10)                    | 2/10 (20) | 1/9 (11)    | 1/9 (11)  |
|                                          | ToS-B+ToR-B <sup>&amp;</sup>                          | 1/10 (10)                    | 0/10 (0)  | 2/9 (22)    | 0/9 (0)   |
|                                          | ToS-B <sup>¶</sup>                                    | 0/10 (0)                     | 0/10 (0)  | 0/9 (0)     | 0/9 (0)   |
|                                          | ToR-B <sup>¶</sup>                                    | 3/10 (30)                    | 5/10 (50) | 3/9 (33)    | 4/9 (44)  |
| ToSRV-A <sub>(wt)</sub> /ToRMV-A         | ToS-A <sub>(wt)</sub> +ToR-A <sup>&amp;</sup>         | 2/10 (20)                    | 0/10 (0)  | 2/10 (20)   | 0/10 (0)  |
|                                          | ToS-A <sub>(wt)</sub> <sup>¶</sup>                    | 2/10 (20)                    | 2/10 (20) | 1/10 (10)   | 2/10 (20) |
|                                          | ToR-A <sup>¶</sup>                                    | 1/10 (10)                    | 3/10 (30) | 4/10 (40)   | 3/10 (30) |
|                                          | ToS-B+ToR-B <sup>&amp;</sup>                          | 1/10 (10)                    | 2/10 (20) | 1/10 (10)   | 0/10 (0)  |
|                                          | ToS-B <sup>¶</sup>                                    | 0/10 (0)                     | 1/10 (10) | 0/10 (0)    | 0/10 (0)  |
|                                          | ToR-B <sup>¶</sup>                                    | 4/10 (40)                    | 2/10 (20) | 4/10 (40)   | 2/10 (20) |

<sup>\*</sup> For simplicity, treatments are named based on the DNA-A; wild-type DNA-B components were always inoculated together with their cognate DNA-A components.

<sup>§</sup> Number of infected plants/number of inoculated plants (percentage of infected plants), confirmed by PCR with virus-specific primers (single infection) or RCA-RFLP (mixed infection) at 28 days after inoculation. Four independent treatments were carried out.

<sup>#</sup> Plants inoculated with each virus in single infection.

<sup>&</sup> Plants inoculated with both viruses in which DNA-A or DNA-B of both viruses were detected.

<sup>¶</sup> Plants inoculated with both viruses in which DNA-A or DNA-B of only one of the two viruses was detected.

**Supplementary Table S2.** Infectivity statistics of clones of tomato severe rugose virus (ToSRV) in single infection and mixed infection with tomato rugose mosaic virus (ToRMV).

| Comparison                                                     | Wilcoxon rank sum test | Student's <i>t</i> -test |
|----------------------------------------------------------------|------------------------|--------------------------|
| <i>Single infection</i>                                        |                        |                          |
| ToSRV <sub>(wt)</sub> vs ToRMV                                 | $p = 0.4292$ ns        | $p = 0.36$ ns            |
| ToSRV <sub>(wt)</sub> vs ToSRV <sub>(ToR:CR)</sub>             | $p = 0.3807$ ns        | $p = 0.62$ ns            |
| ToSRV <sub>(wt)</sub> vs ToSRV <sub>(ToR:IRD)</sub>            | $p = 0.3572$ ns        | $p = 0.37$ ns            |
| ToSRV <sub>(wt)</sub> vs ToSRV <sub>(ToR:CR+IRD)</sub>         | $p = 0.8809$ ns        | $p = 0.46$ ns            |
| <i>Mixed infection</i>                                         |                        |                          |
| ToSRV <sub>(wt)</sub> vs ToSRV <sub>(wt)</sub> + ToRMV         | $p = 0.0275^{**}$      | $p = 0.007^{**}$         |
| ToSRV <sub>(wt)</sub> vs ToSRV-A <sub>(ToR:CR)</sub> + ToRMV   | $p = 1$ ns             | $p = 0.87$ ns            |
| ToSRV <sub>(wt)</sub> vs ToSRV <sub>(ToR:IRD)</sub> + ToRMV    | $p = 0.0256^{**}$      | $p = 0.006^{**}$         |
| ToSRV <sub>(wt)</sub> vs ToSRV <sub>(ToR:CR+IRD)</sub> + ToRMV | $p = 0.0408^{**}$      | $p = 0.02^{**}$          |

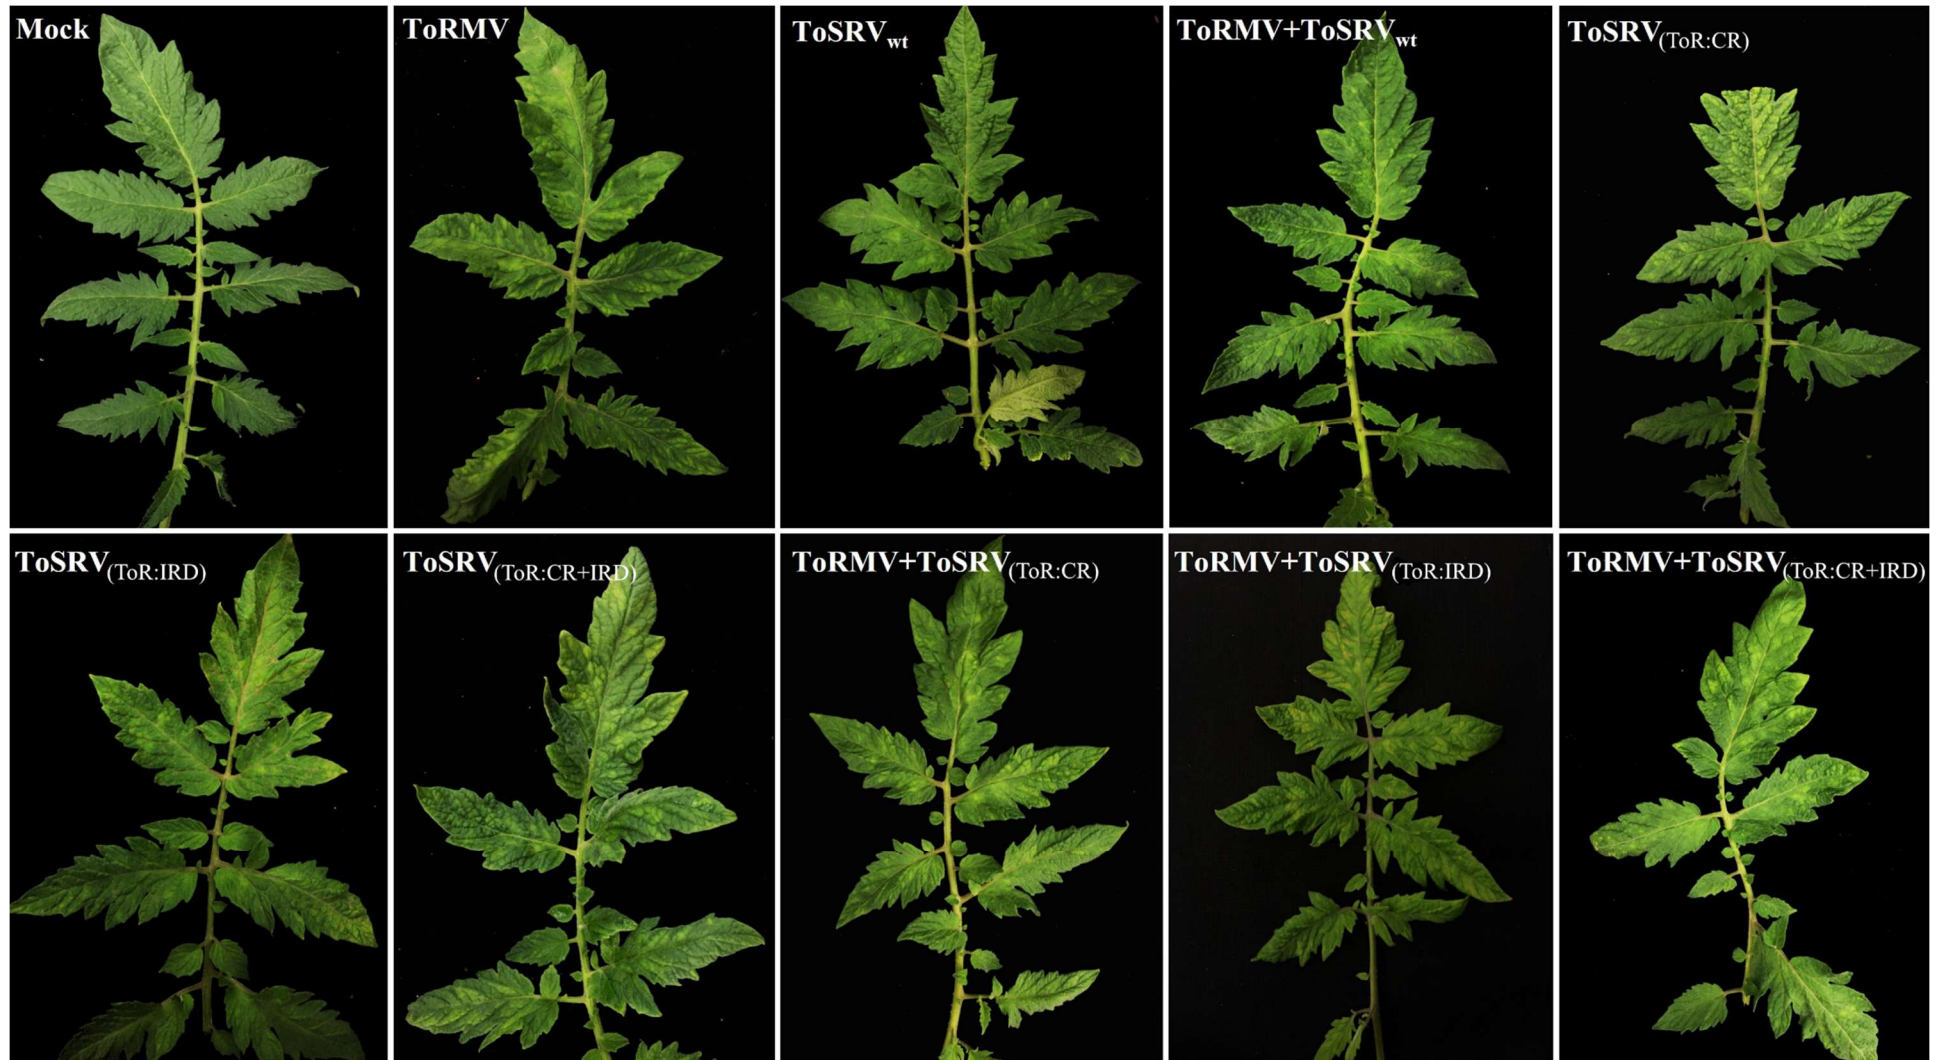

**Supplementary Figure S1.** Symptoms in tomato plants biolistically inoculated with tomato rugose mosaic virus (ToRMV) and tomato severe rugose virus (ToSRV<sub>(wt)</sub>, ToSRV-A<sub>(ToR:CR)</sub>, ToSRV-A<sub>(ToR:IRD)</sub> and ToSRV-A<sub>(ToV:CR+IRD)</sub>) infectious clones in single and mixed infection, as indicated. All images obtained at 28 days after inoculation.

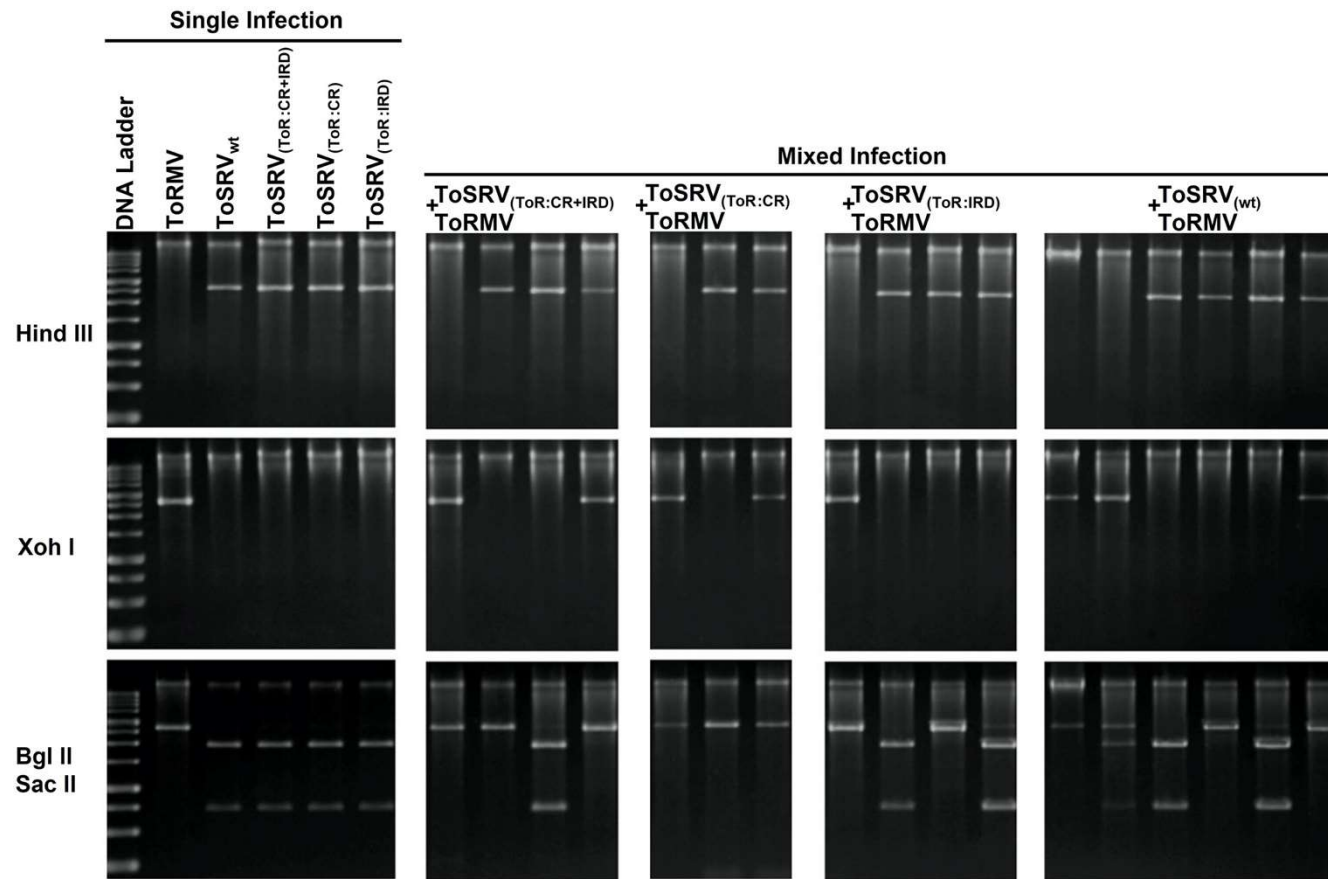

**Supplementary Figure S2.** Specific detection of DNA-A and DNA-B components of tomato rugose mosaic virus (ToRMV) and tomato severe rugose virus (ToSRV) in mixed infection by RCA-RFLP. Digestion with HindIII enables the detection of ToSRV DNA-A, generating a fragment of approximately 2,600 nucleotides (nt). Digestion with XhoI enables the detection of ToRMV DNA-A, generating a fragment of approximately 2,600 nt. Digestion with BglII+SacII enables the detection and differentiation of DNA-B components, generating fragments of 1,800 and 800 nt for ToSRV DNA-B and approximately 2,600 nt for ToRMV DNA-B. Detection of ToRMV and ToSRV in single infection shown as controls. M, size marker (1 kb plus DNA ladder, Kasvi).

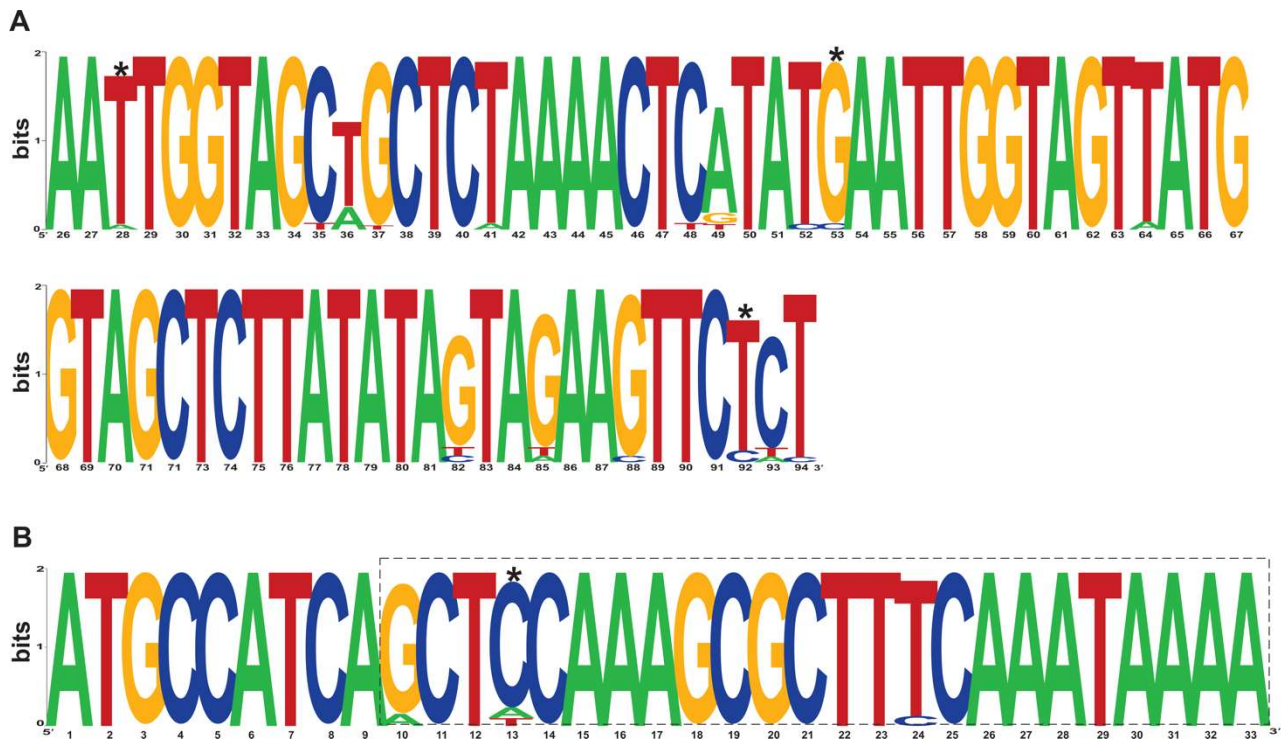

**Supplementary Figure S3.** Weblogo (created using the WebLogo web server at [weblogo.threeplusone.com](http://weblogo.threeplusone.com)) describing the multiple alignment of the common region (CR) and Rep partial nucleotide sequences of tomato severe rugose virus (ToSRV) isolates. **A.** Partial alignment of CR nucleotide sequences including the divergent positions 1-5. **B.** Partial alignment of Rep nucleotide sequences including the IRD domain delimited by dashed lines. The asterisks correspond to the altered nucleotides for the construction of the ToSRV-A<sub>(ToR:IRD)</sub> and ToSRV-A<sub>(ToR:CR+IRD)</sub> clones. The y-axis represents the bit score, where 2 means 100% conservation. The x-axis displays the nucleotide position in the multiple sequence alignment. The height of the letters indicates the level of conservation at that specific position.
